# Supplementary material for: Long Telomeres Do Not Affect Cellular Fitness in Yeast
Source: PubMed Central journal article supplement (PMC5574717; doi:10.1128/mbio.01314-17), 2017-08-29
Supplement: mbo004173461sf1.pdf [file mbo004173461sf1.pdf]

**A**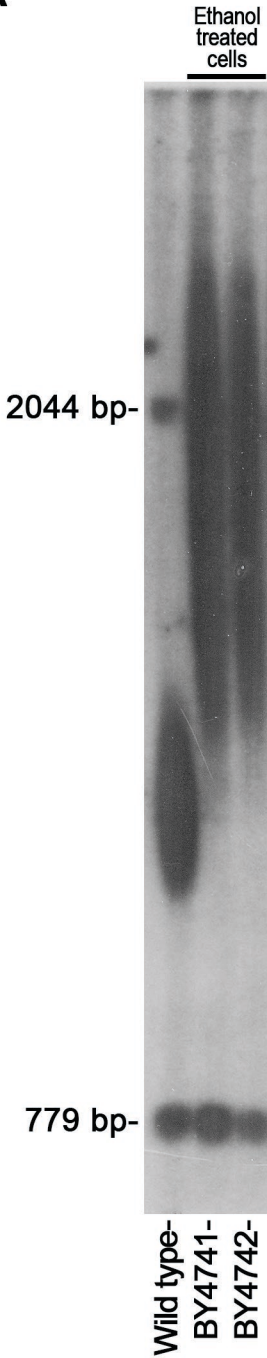**B**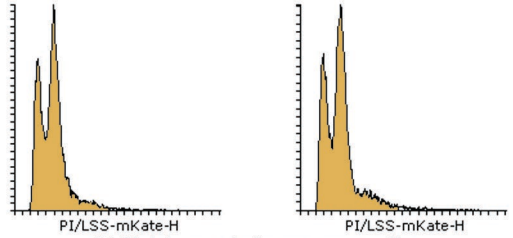**Wild type telomere cells**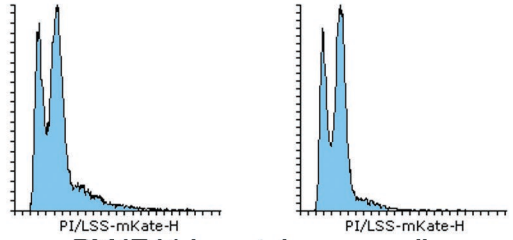**BY4741 long telomere cells**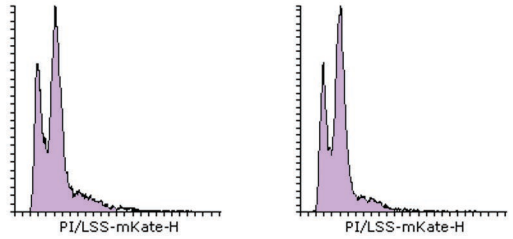**BY4742 long telomere cells**
